# Supplementary material for: CPX-351 (Liposomal Cytarabine and Daunorubicin) versus venetoclax plus hypomethylating agent therapy in newly diagnosed acute myeloid leukemia: a retrospective comparison involving 600 Mayo Clinic patients
Source: Research Square preprint supplement (doi:10.21203/rs.3.rs-8233179/v1), 2025-12-22
Supplement: Supplementary file 1 [file 0133564f5bdc4b708e0dac6a.docx]

**Supplemental Table 1. Clinical characteristics, cytogenetics and co-mutation patterns at diagnosis of 274 patients with acute myeloid leukemia (AML) with myelodysplasia-related gene mutations or cytogenetic abnormalities stratified by upfront treatment with liposomal daunorubicin and cytarabine (CPX-351) versus venetoclax plus a hypomethylating agent (Ven-HMA).**

| **Variables** | **All patients**  **N=274** | **CPX-351**  **N=57** | **Ven-HMA**  **N=217** | **Univariate**  ***P-value*** |
| --- | --- | --- | --- | --- |
| Age in years; median (range) | 73 (35-92) | 66 (35 -76) | 74 (37-92) | **<0.01** |
| Age ≥60 years; n (%) | 247 (90) | 43 (75) | 204 (94) |
| Male; n (%) | 171 (62) | 25 (44) | 146 (67) | **<0.01** |
| De novo AML; n (%) | 126 (46) | 20 (35) | 106 (49) | 0.06 |
| Preceding hematological diagnosis in non-de novo AML, (n = 148)  Myelodysplastic syndrome (MDS); n (%)  Myelodysplastic/Myeloproliferative neoplasm (MDS/MPN); n (%)  Therapy- related; n (%) | 76 (51)  24 (16)  48 (32) | 21 (57)  6 (16)  10 (27) | 55 (50)  18 (16)  38 (34) | 0.7 |
| Prior HMA treatment; n (%) | 38 (14) | 15 (26) | 23 (11) | **<0.01** |
| Leukocytes, x109/L; median (range)  (Evaluable = 270) | 3 (0.4-281) | 2 (0.5-281) | 4 (0.4-131) | 0.5 |
| Hemoglobin, g/dL; median (range)  (Evaluable = 215) | 9 (6-15) | 8 (6-12) | 9 (6-15) | 0.9 |
| Platelets, x109/L; median (range)  (Evaluable = 263) | 56 (5-683) | 50 (6-683) | 59 (5-601) | 0.5 |
| Circulating blast %; median (range)  (Evaluable = 249) | 9 (0-93) | 11 (0-80) | 9 (0-93) | 0.3 |
| Bone marrow blast %; median (range)  (Evaluable = 265) | 34 (1-96) | 31 (5-84) | 35 (1-96) | 0.1 |
| ELN 2022 cytogenetic risk (Evaluable = 269)  Adverse  Non-adverse | 88 (33)  181 (67) | 22 (39)  35 (61) | 66 (31)  146(69) | 0.3 |
| Presence of complex or monosomal karyotype; n (%)  (Evaluable = 262) | 53 (20) | 13 (23) | 40 (20) | 0.6 |
| *ASXL1*MUT; n (%)  (Evaluable = 226) | 79 (35) | 16 (32) | 63 (36) | 0.6 |
| *BCOR*MUT; n (%)  (Evaluable = 226) | 37 (16) | 11 (22) | 26 (15) | 0.2 |
| *CBL*MUT; n (%)  (Evaluable = 226) | 14 (6) | 6 (12) | 8 (5) | 0.07 |
| *CEBPA*MUT; n (%)  (Evaluable = 256) | 16 (6) | 5 (9) | 11 (5) | 0.3 |
| *DNMT3A*MUT; n (%)  (Evaluable = 253) | 38 (15) | 9 (17) | 29 (15) | 0.7 |
| *EZH2*MUT; n (%)  (Evaluable = 226) | 9 (4) | 1 (2) | 8 (5) | 0.4 |
| *FLT3*MUT; n (%)  (Evaluable = 259) | 22 (8) | 2 (4) | 20 (10) | 0.1 |
| *IDH1*MUT; n (%)  (Evaluable = 257) | 19 (7) | 3 (6) | 16 (8) | 0.5 |
| *IDH2*MUT; n (%)  (Evaluable = 257) | 36 (14) | 12 (22) | 24 (12) | 0.06 |
| *JAK2*MUT; n (%)  (Evaluable = 228) | 8 (4) | 1 (2) | 7 (4) | 0.5 |
| *KRAS*MUT; n (%)  (Evaluable = 252) | 19 (8) | 4 (8) | 15 (8) | 0.9 |
| *NRAS*MUT; n (%)  (Evaluable = 252) | 26 (10) | 5 (9) | 21 (11) | 0.8 |
| *NPM1*MUT; n (%)  (Evaluable = 257) | 7 (3) | 1 (2) | 6 (3) | 0.6 |
| *PHF6*MUT; n (%)  (Evaluable = 226) | 8 (4) | 0 (0) | 8 (5) | **0.04** |
| *PTPN11*MUT; n (%)  (Evaluable = 226) | 8 (4) | 4 (8) | 4 (2) | 0.08 |
| *RUNX1*MUT; n (%)  (Evaluable = 251) | 93 (37) | 20 (38) | 73 (37) | 0.8 |
| *SETBP1*MUT; n (%)  (Evaluable = 226) | 8 (4) | 0 (0) | 8 (5) | **0.04** |
| *SF3B1*MUT; n (%)  (Evaluable = 226) | 22 (10) | 6 (12) | 16 (9) | 0.5 |
| *SRSF2*MUT; n (%)  (Evaluable = 226) | 72 (32) | 11 (22) | 61 (35) | 0.08 |
| *STAG2*MUT; n (%)  (Evaluable = 226) | 30 (13) | 7 (14) | 23 (13) | 0.39 |
| *TET2*MUT; n (%)  (Evaluable = 226) | 58 (26) | 9 (18) | 49 (28) | 0.1 |
| *TP53*MUT; n (%)  (Evaluable = 256) | 9 (4) | 2 (4) | 7 (3) | 0.9 |
| *U2AF1*MUT; n (%)  (Evaluable = 226) | 26 (12) | 7 (14) | 19 (11) | 0.5 |
| *WT1*MUT; n (%)  (Evaluable = 226) | 11 (5) | 4 (8) | 7 (4) | 0.3 |
| *ZRSR2*MUT; n (%)  (Evaluable = 477) | 4 (2) | 3 (6) | 1 (1) | **0.02** |
| Complete response with or without count recovery (CR/CRi); n (%) | 170 (62) | 34 (60) | 136 (63) | 0.7 |
| Allogeneic stem cell transplant; n (%) | 72 (26) | 30 (53) | 42 (19) | **<0.01** |
