# Supplementary material for: CPX-351 (Liposomal Cytarabine and Daunorubicin) versus venetoclax plus hypomethylating agent therapy in newly diagnosed acute myeloid leukemia: a retrospective comparison involving 600 Mayo Clinic patients
Source: Research Square preprint supplement (doi:10.21203/rs.3.rs-8233179/v1), 2025-12-22
Supplement: Supplementary file 2 [file 1782846d8f74668b4adbda4d.docx]

**Supplemental Table 3. Comparison of Overall survival (OS) censored at allogeneic stem cell transplant (ASCT) in 274 patients with newly diagnosed acute myeloid leukemia (AML) with myelodysplasia-related gene mutations or cytogenetic abnormalities treated with liposomal daunorubicin and cytarabine (CPX-351) versus venetoclax plus a hypomethylating agent (Ven-HMA).**

| Variables | Overall survival  CPX-351 vs. Ven-HMA | P-value |
| --- | --- | --- |
| Age ≥60 years  N=247 | 12 vs. 15 months | 0.7  (sex-adjusted p=0.6) |
| Male sex  N= 171 | 9 vs. 13 months | 0.5  (age-adjusted p=0.9) |
| De novo AML  N=126 | 14 vs. 18 months | 0.7  (age-adjusted p=0.7)  (sex-adjusted p=0.7) |
| Post-myelodysplastic syndrome AML  N=76 | 8 vs. 15 months | **0.02**  **(age-adjusted p=0.02)**  **(sex-adjusted p=0.03)** |
| Post-myelodysplastic/myeloproliferative neoplasm AML  N=24 | 13 vs. 6 months | 0.9  (age-adjusted p=0.5)  (sex-adjusted p=0.5) |
| Therapy-related AML  N=57 | 14 vs. 13 months | 0.8  (age-adjusted p=0.5)  (sex-adjusted p=0.1) |
| Presence of ELN adverse cytogenetic risk  N= 88 | 9 vs. 9 months | 0.9  (age-adjusted p=0.7)  (sex-adjusted p=0.7) |
| Presence of *TP53* mutation  N=9 | 6 vs. 10 months | 0.2  (age-adjusted p=0.5)  (sex-adjusted p=0.5) |
| Presence of *RUNX1* mutation  N=93 | 13 vs. 15 months | 0.9  (age-adjusted p=0.9)  (sex-adjusted p=0.8) |
| Presence of *ASXL1* mutation  N=79 | 10 vs. 18 months | 0.2  (age-adjusted p=0.2)  (sex-adjusted p=0.2) |
| Presence of *SRSF2* mutation  N=72 | 9 vs. 16 months | 0.08  (age-adjusted p=0.4)  (sex-adjusted p=0.08) |
| Presence of *TET2* mutation  N=58 | 9 vs. 15 months | 0.09  (age-adjusted p=0.1)  (sex-adjusted p=0.2) |
| Presence of *DNMT3A* mutation  N=38 | Not reached vs. 20 months | 0.5  (age-adjusted p=0.5)  (sex-adjusted p=0.6) |
| Presence of *IDH2* mutation  N=36 | 14 vs. 29 months | 0.3  (age-adjusted p=0.3)  (sex-adjusted p=0.4) |
| Presence of *FLT3* mutation  N=22 | Not reached vs. 8 months | 0.7  (age-adjusted p=0.7)  (sex-adjusted p=0.7) |
| Presence of *NPM1* mutation  N=7 | Not reached vs. 6 months | 0.4  (age-adjusted p=0.9)  (sex-adjusted p=0.9) |
| Presence of *NRAS* mutation  N=26 | 27 vs. 11 months | 0.4  (age-adjusted p=0.3)  (sex-adjusted p=0.4) |
| Presence of *BCOR* mutation  N=37 | 39 vs. 19 months | 0.7  (age-adjusted p=0.5)  (sex-adjusted p=0.6) |
| Presence of *IDH1* mutation  N=19 | Not reached vs. Not reached | 0.9  (age-adjusted p=0.7)  (sex-adjusted p=0.9) |
| Presence of *STAG2* mutation  N=30 | 8 vs. 21 months | 0.2  (age-adjusted p=0.3)  (sex-adjusted p=0.2) |
| Presence of *U2AF1* mutation  N=26 | 7 vs. 10 months | 0.8  (age-adjusted p= 0.8)  (sex-adjusted p= 0.6) |
| Presence of *CEBPA* mutation  N=16 | 8 vs. 13 months | 0.7  (age-adjusted p=0.7)  (sex-adjusted p=0.4) |
| Presence of *SF3B1* mutation  N=22 | Not reached vs. 14 months | 0.07  **(age-adjusted p=0.04)**  **(sex-adjusted p=0.01)** |
| Presence of *KRAS* mutation  N=19 | 8 vs. 6 months | 0.9  (age-adjusted p=0.7)  (sex-adjusted p=0.9) |
| Presence of *CBL* mutation  N=14 | 4 vs. 15 months | **<0.01**  **(age-adjusted p=0.054)**  **(sex-adjusted p=0.045)** |
| Presence of *EZH2* mutation  N=9 | 2 vs. 9 months | 0.06  (age-adjusted p=0.3)  (sex-adjusted p=0.2) |
| Presence of *PTPN11* mutation  N=8 | 14 vs. 6 months | **0.01**  **(age-adjusted p=0.02)**  **(sex-adjusted p=0.01)** |
| Presence of *ZRSR2* mutation  N=4 | Not reached vs. 5 months | 0.7  (age-adjusted p=0.7)  (sex-adjusted p=0.7) |
