# Supplementary material for: CPX-351 (Liposomal Cytarabine and Daunorubicin) versus venetoclax plus hypomethylating agent therapy in newly diagnosed acute myeloid leukemia: a retrospective comparison involving 600 Mayo Clinic patients
Source: Research Square preprint supplement (doi:10.21203/rs.3.rs-8233179/v1), 2025-12-22
Supplement: Supplementary file 3 [file 40049ef72a3f0a2cd78293e8.docx]

**Supplemental table 2. Comparison of the rates of achievement of Complete response with or without count recovery (CR/CRi) in 274 patients with newly diagnosed acute myeloid leukemia (AML) with myelodysplasia-related gene mutations or cytogenetic abnormalities treated with liposomal daunorubicin and cytarabine (CPX-351) versus venetoclax plus a hypomethylating agent (Ven-HMA).**

| Variables | Univariate analysis  Rate of CR/CRi  CPX-351 vs. Ven-HMA | P-value |
| --- | --- | --- |
| Age ≥60 years  N=247 | 65% vs. 63% | 0.8  (sex-adjusted p=0.9) |
| Male sex  N= 171 | 48% vs. 62% | 0.5  (age-adjusted p=0.4) |
| De novo AML  N=126 | 55% vs. 69% | 0.2  (age-adjusted p=0.3)  (sex-adjusted p =0.2) |
| Post-myelodysplastic syndrome AML  N=76 | 48% vs. 53% | 0.7  (age-adjusted p=0.6)  (sex-adjusted p=0.6) |
| Post- myelodysplastic/myeloproliferative syndrome AML  N=24 | 67% vs. 44% | 0.3  (age-adjusted p=0.7)  (sex-adjusted p =0.2) |
| Therapy-related AML  N=57 | 77% vs. 66% | 0.4  (age-adjusted p=0.4)  (sex-adjusted p=0.5) |
| Presence of ELN adverse cytogenetic risk  N=88 | 59% vs. 53% | 0.4  (age-adjusted p=0.4)  (sex-adjusted p=0.1) |
| Presence of *TP53* mutation  N=9 | 50% vs. 71% | 0.6  (age-adjusted p=0.6)  (sex-adjusted p=0.3) |
| Presence of *RUNX1* mutation  N=93 | 60% vs. 56% | 0.8  (age-adjusted p=0.8)  (sex-adjusted p=0.9) |
| Presence of *ASXL1* mutation  N=79 | 56% vs. 67% | 0.4  (age-adjusted p=0.8)  (sex-adjusted p=0.3) |
| Presence of *SRSF2* mutation  N=72 | 45% vs. 72% | 0.09  (age-adjusted p=0.1)  (sex-adjusted p=0.05) |
| Presence of *TET2* mutation  N=58 | 67% vs. 67% | 0.9  (age-adjusted p=0.7)  (sex-adjusted p=0.9) |
| Presence of *DNMT3A* mutation  N=38 | 78% vs. 72% | 0.7  (age-adjusted p=0.6)  (sex-adjusted p=0.9) |
| Presence of *IDH2* mutation  N=36 | 58% vs. 71% | 0.5  (age-adjusted p=0.9)  (sex-adjusted p=0.3) |
| Presence of *FLT3* mutation  N=22 | 50% vs. 35% | 0.7  (age-adjusted p=0.9)  (sex-adjusted p=0.4) |
| Presence of *NPM1* mutation  N=7 | 100% vs. 67% | 0.4  (age-adjusted p=0.5)  (sex-adjusted p=0.4) |
| Presence of *NRAS* mutation  N=26 | 80% vs. 62% | 0.4  (age-adjusted p=0.7)  (sex-adjusted p=0.6) |
| Presence of *BCOR* mutation  N=37 | 64% vs. 69% | 0.7  (age-adjusted p=0.7)  (sex-adjusted p=0.5) |
| Presence of *IDH1* mutation  N=19 | 67% vs. 88% | 0.4  (age-adjusted p=0.4)  (sex-adjusted p=0.4) |
| Presence of *STAG2* mutation  N=30 | 57% vs. 83% | 0.2  (age-adjusted p=0.2)  (sex-adjusted p=0.2) |
| Presence of *U2AF1* mutation  N=26 | 57% vs. 58% | 0.9  (age-adjusted p=0.9)  (sex-adjusted p=0.8) |
| Presence of *CEBPA* mutation  N=16 | 40% vs. 91% | **0.03**  **(age-adjusted p<0.01)**  **(sex-adjusted p <0.01)** |
| Presence of *SF3B1* mutation  N=22 | 67% vs. 50% | 0.5  (age-adjusted p=0.7)  (sex-adjusted p=0.5) |
| Presence of *KRAS* mutation  N=19 | 50% vs. 53% | 0.9  (age-adjusted p=0.8)  (sex-adjusted p=0.9) |
| Presence of *CBL* mutation  N=14 | 33% vs. 75% | 0.1  (age-adjusted p=0.6)  (sex-adjusted p=0.5) |
| Presence of *EZH2* mutation  N=9 | 0% vs. 50% | 0.3  (age-adjusted p=0.4)  (sex-adjusted p=0.3) |
| Presence of *PTPN11* mutation  N=8 | 50% vs. 25% | 0.5  (age-adjusted p=0.3)  (sex-adjusted p=0.08) |
| Presence of *ZRSR2* mutation  N=4 | 33% vs. 100% | 0.2  **(age-adjusted p=0.049)**  (sex-adjusted p=0.2) |
