# Supplementary material for: CPX-351 (Liposomal Cytarabine and Daunorubicin) versus venetoclax plus hypomethylating agent therapy in newly diagnosed acute myeloid leukemia: a retrospective comparison involving 600 Mayo Clinic patients
Source: Research Square preprint supplement (doi:10.21203/rs.3.rs-8233179/v1), 2025-12-22
Supplement: Supplementary file 4 [file 57e50ec8b28d483b6470e367.docx]

**Supplemental Table 6. Comparison of Overall survival (OS) censored at allogeneic stem cell transplant (ASCT) in 253 patients with clinically defined secondary acute myeloid leukemia (AML) treated with liposomal daunorubicin and cytarabine (CPX-351) versus venetoclax plus a hypomethylating agent (Ven-HMA).**

| Variables | Overall survival  CPX-351 vs. Ven-HMA | P-value |
| --- | --- | --- |
| Age ≥60 years  N=225 | 9 vs. 12 months | 0.4  (sex-adjusted p=0.3) |
| Male sex  N=138 | 8 vs. 10 months | 0.1  (age-adjusted p=0.3) |
| Post-myelodysplastic syndrome AML  N=114 | 7 vs. 12 months | **0.01**  **(age-adjusted p=0.02)**  **(sex-adjusted p=0.02)** |
| Post-myelodysplastic/myeloproliferative neoplasm AML  N=36 | 10 vs. 6 months | 0.8  (age-adjusted p=0.6)  (sex-adjusted p=0.9) |
| Therapy-related AML  N=127 | 13 vs. 11 months | 0.4  (age-adjusted p=0.4)  (sex-adjusted p=0.8) |
| Presence of ELN adverse cytogenetic risk  N=104 | 9 vs. 8 months | 0.9  (age-adjusted p=0.9)  (sex-adjusted p=0.8) |
| Presence of *TP53* mutation  N=59 | 10 vs. 7 months | 0.9  (age-adjusted p=0.9)  (sex-adjusted p=0.9) |
| Presence of *RUNX1* mutation  N=56 | 8 vs. 12 months | 0.3  (age-adjusted p=0.3)  (sex-adjusted p=0.7) |
| Presence of *ASXL1* mutation  N=48 | 9 vs. 15 months | 0.09  (age-adjusted p=0.4)  (sex-adjusted p=0.1) |
| Presence of *SRSF2* mutation  N=42 | 9 vs. 14 months | 0.9  (age-adjusted p=0.6)  (sex-adjusted p=0.08) |
| Presence of *TET2* mutation  N=43 | 8 vs. 10 months | 0.3  (age-adjusted p=0.4)  (sex-adjusted p=0.2) |
| Presence of *DNMT3A* mutation  N=24 | 9 vs. 11 months | 0.7  (age-adjusted p=0.5)  (sex-adjusted p=0.7) |
| Presence of *IDH2* mutation  N=15 | 14 vs. 29 months | 0.6  (age-adjusted p=0.7)  (sex-adjusted p=0.6) |
| Presence of *FLT3* mutation  N=27 | 10 vs. 10 months | 0.7  (age-adjusted p=0.2)  (sex-adjusted p=0.9) |
| Presence of *NPM1* mutation  N=13 | 21 vs. 9 months | 0.4  (age-adjusted p=0.9)  (sex-adjusted p=0.6) |
| Presence of *NRAS* mutation  N=19 | 14 vs. 6 months | 0.3  (age-adjusted p=0.3)  (sex-adjusted p=0.4) |
| Presence of *BCOR* mutation  N=17 | 8 vs. 15 months | 0.3  (age-adjusted p=0.6)  (sex-adjusted p=0.4) |
| Presence of *IDH1* mutation  N=10 | Not reached vs. Not reached | 0.4  (age-adjusted p=0.9)  (sex-adjusted p=0.9) |
| Presence of *STAG2* mutation  N=16 | 8 vs. 14 months | 0.2  (age-adjusted p=0.3)  (sex-adjusted p=0.3) |
| Presence of *U2AF1* mutation  N=17 | 6 vs. 8 months | 0.5  (age-adjusted p=0.8)  (sex-adjusted p=0.5) |
| Presence of *CEBPA* mutation  N=14 | Not reached vs. 10 months | 0.2  (age-adjusted p=0.3)  (sex-adjusted p=0.2) |
| Presence of *SF3B1* mutation  N=12 | Not reached vs. 13 months | 0.1  (age-adjusted p=0.054)  **(sex-adjusted p=0.03)** |
| Presence of *KRAS* mutation  N=15 | 8 vs. 6 months | 0.8  (age-adjusted p=0.3)  (sex-adjusted p=0.9) |
| Presence of *CBL* mutation  N=9 | 4 vs. Not reached months | 0.06  **(age-adjusted p=0.01)**  **(sex-adjusted p=0.057)** |
| Presence of *EZH2* mutation  N=4 | 2 vs. 9 months | 0.08  (age-adjusted p=0.1)  (sex-adjusted p=0.2) |
| Presence of *PTPN11* mutation  N=5 | 13 vs. 3 months | **0.04**  **(age-adjusted p=0.2)**  **(sex-adjusted p=0.01)** |
