# Supplementary material for: CPX-351 (Liposomal Cytarabine and Daunorubicin) versus venetoclax plus hypomethylating agent therapy in newly diagnosed acute myeloid leukemia: a retrospective comparison involving 600 Mayo Clinic patients
Source: Research Square preprint supplement (doi:10.21203/rs.3.rs-8233179/v1), 2025-12-22
Supplement: Supplementary file 5 [file 7cd4bd6df219880eeaf8e02f.docx]

**Supplementary Table 4. Clinical characteristics, cytogenetics and co-mutation patterns at diagnosis of 253 patients with clinically defined secondary acute myeloid leukemia (AML) stratified by upfront treatment with liposomal daunorubicin and cytarabine (CPX-351) versus venetoclax plus a hypomethylating agent (Ven-HMA).**

| **Variables** | **All patients**  **N=253** | **CPX-351**  **N=66** | **Ven-HMA**  **N=187** | **Univariate**  ***P-value*** |
| --- | --- | --- | --- | --- |
| Age in years; median (range) | 72 (19-98) | 66 (19 -77) | 73 (19-98) | **<0.01** |
| Age ≥60 years; n (%) | 225 (89) | 50 (76) | 175 (94) |
| Male; n (%) | 138 (55) | 29 (44) | 109 (58) | **0.04** |
| Secondary AML:  Post-Myelodysplastic syndrome; n (%)  Post-Myelodysplastic/Myeloproliferative neoplasm; n (%)  Therapy- related; n (%) | 114 (45)  36 (14)  103 (41) | 32 (48)  11 (17)  23 (35) | 82 (44)  25 (13)  80 (43) | 0.5 |
| Prior HMA treatment; n (%) | 61 (24) | 24 (36) | 37 (20) | **<0.01** |
| Leukocytes, x109/L; median (range)  (Evaluable = 249) | 3 (0.5-281) | 3 (0.5-281) | 3 (0.5-183) | 0.4 |
| Hemoglobin, g/dL; median (range)  (Evaluable = 251) | 8 (3-14) | 8 (6-12) | 9 (3-14) | 0.9 |
| Platelets, x109/L; median (range)  (Evaluable = 245) | 50 (4-1002) | 50 (4-1002) | 48 (5-601) | 0.5 |
| Circulating blast %; median (range)  (Evaluable = 236) | 10 (0-92) | 13 (0-80) | 9 (0-92) | 0.7 |
| Bone marrow blast %; median (range)  (Evaluable = 242) | 30 (1-95) | 30 (5-84) | 32 (1-95) | 0.1 |
| ELN 2022 cytogenetic risk (Evaluable = 244)  Adverse  Non-adverse | 104 (43)  140 (57) | 26 (40)  39 (60) | 78 (44)  101 (56) | 0.6 |
| Presence of complex or monosomal karyotype; n (%)  (Evaluable = 243) | 85 (35) | 21 (32) | 64 (36) | 0.6 |
| *ASXL1*MUT; n (%)  (Evaluable = 202) | 48 (24) | 11 (21) | 37 (25) | 0.5 |
| *BCOR*MUT; n (%)  (Evaluable = 202) | 17 (8) | 4 (8) | 13 (9) | 0.8 |
| *CBL*MUT; n (%)  (Evaluable = 202) | 9 (4) | 6 (11) | 3 (2) | **<0.01** |
| *CEBPA*MUT; n (%)  (Evaluable = 231) | 14 (6) | 4 (7) | 10 (6) | 0.8 |
| *DNMT3A*MUT; n (%)  (Evaluable = 229) | 24 (10) | 9 (15) | 15 (9) | 0.2 |
| *EZH2*MUT; n (%)  (Evaluable = 202) | 4 (2) | 1 (2) | 3 (2) | 0.9 |
| *FLT3*MUT; n (%)  (Evaluable = 237) | 27 (11) | 8 (13) | 19 (11) | 0.7 |
| *IDH1*MUT; n (%)  (Evaluable = 236) | 10 (4) | 1 (2) | 9 (5) | 0.2 |
| *IDH2*MUT; n (%)  (Evaluable = 236) | 15 (6) | 6 (10) | 9 (5) | 0.2 |
| *JAK2*MUT; n (%)  (Evaluable = 202) | 8 (4) | 2 (4) | 6 (4) | 0.9 |
| *KRAS*MUT; n (%)  (Evaluable = 228) | 15 (7) | 4 (7) | 11 (7) | 0.9 |
| *NRASMUT*; n (%)  (Evaluable = 228) | 19 (8) | 2 (3) | 17 (10) | 0.08 |
| *NPM1*MUT; n (%)  (Evaluable = 235) | 13 (6) | 4 (6) | 9 (5) | 0.7 |
| *PHF6*MUT; n (%)  (Evaluable = 202) | 7 (3) | 0 (0) | 7 (5) | **0.04** |
| *PTPN11*MUT; n (%)  (Evaluable = 201) | 5 (2) | 3 (6) | 2 (1) | 0.1 |
| *RUNX1*MUT; n (%)  (Evaluable =228) | 56 (25) | 13 (22) | 43 (25) | 0.6 |
| *SETBP1*MUT; n (%)  (Evaluable = 201) | 6 (3) | 0 (0) | 6 (4) | 0.06 |
| *SF3B1*MUT; n (%)  (Evaluable = 201) | 12 (6) | 4 (8) | 8 (5) | 0.6 |
| *SRSF2*MUT; n (%)  (Evaluable = 201) | 42 (21) | 9 (17) | 33 (22) | 0.4 |
| *STAG2*MUT; n (%)  (Evaluable =200) | 16 (8) | 3 (6) | 13 (9) | 0.5 |
| *TET2*MUT; n (%)  (Evaluable = 202) | 43 (21) | 6 (11) | 37 (25) | **0.03** |
| *TP53*MUT; n (%)  (Evaluable = 236) | 59 (25) | 10 (16) | 49 (28) | 0.06 |
| *U2AF1*MUT; n (%)  (Evaluable = 201) | 17 (8) | 4 (8) | 13 (9) | 0.8 |
| *WT1*MUT; n (%)  (Evaluable = 202) | 6 (3) | 3 (6) | 3 (2) | 0.2 |
| *ZRSR2*MUT; n (%)  (Evaluable = 202) | 1 (1) | 1 (2) | 0 (0) | 0.1 |
| Complete response with or without count recovery (CR/CRi); n (%) | 105 (42) | 25 (38) | 80 (43) | 0.5 |
| Allogeneic stem cell transplant; n (%) | 67 (26) | 32 (48) | 35 (19) | **<0.01** |
