# Supplementary material for: CPX-351 (Liposomal Cytarabine and Daunorubicin) versus venetoclax plus hypomethylating agent therapy in newly diagnosed acute myeloid leukemia: a retrospective comparison involving 600 Mayo Clinic patients
Source: Research Square preprint supplement (doi:10.21203/rs.3.rs-8233179/v1), 2025-12-22
Supplement: Supplementary file 6 [file a3a19ed803b4225dc20339df.docx]

**Supplemental Table 5. Comparison of the rates of achievement of Complete response with or without count recovery (CR/CRi) in 253 patients with clinically defined secondary acute myeloid leukemia (AML) treated with liposomal daunorubicin and cytarabine (CPX-351) versus venetoclax plus a hypomethylating agent (Ven-HMA).**

| Variables | Univariate analysis  Rate of CR/CRi  CPX-351 vs. Ven-HMA | P-value |
| --- | --- | --- |
| Age ≥60 years  N=225 | 64% vs. 57% | 0.3  (sex-adjusted p=0.2) |
| Male sex  N=138 | 52% vs. 56% | 0.7  (age-adjusted p=0.7) |
| Post-myelodysplastic syndrome AML  N=114 | 47% vs. 49% | 0.9  (age-adjusted p=0.6)  (sex-adjusted p=0.8) |
| Post-myelodysplastic/myeloproliferative neoplasm AML  N=36 | 55% vs. 44% | 0.6  (age-adjusted p=0.7)  (sex-adjusted p=0.5) |
| Therapy-related AML  N=127 | 79% vs. 64% | 0.1  (age-adjusted p=0.2)  (sex-adjusted p=0.1) |
| Presence of ELN adverse cytogenetic risk  N=104 | 50% vs. 53% | 0.8  (age-adjusted p=0.8)  (sex-adjusted p=0.7) |
| Presence of *TP53* mutation  N=59 | 40% vs. 55% | 0.4  (age-adjusted p=0.4)  (sex-adjusted p=0.3) |
| Presence of *RUNX1* mutation  N=56 | 62% vs. 49% | 0.4  (age-adjusted p=0.6)  (sex-adjusted p=0.4) |
| Presence of *ASXL1* mutation  N=48 | 55% vs. 59% | 0.8  (age-adjusted p=0.9)  (sex-adjusted p=0.8) |
| Presence of *SRSF2* mutation  N=42 | 67% vs. 61% | 0.7  (age-adjusted p=0.9)  (sex-adjusted p=0.8) |
| Presence of *TET2* mutation  N=43 | 67% vs. 51% | 0.5  (age-adjusted p=0.7)  (sex-adjusted p=0.6) |
| Presence of *DNMT3A* mutation  N=24 | 67% vs. 53% | 0.5  (age-adjusted p=0.3)  (sex-adjusted p=0.5) |
| Presence of *IDH2* mutation  N=15 | 67% vs. 56% | 0.7  (age-adjusted p=0.2)  (sex-adjusted p=0.7) |
| Presence of *FLT3* mutation  N=27 | 75% vs. 42% | 0.1  (age-adjusted p=0.9)  (sex-adjusted p=0.1) |
| Presence of *NPM1* mutation  N=13 | 100% vs. 67% | 0.1  (age-adjusted p=0.2)  (sex-adjusted p=0.2) |
| Presence of *NRAS* mutation  N=19 | 100% vs. 47% | 0.09  (age-adjusted p=0.2)  (sex-adjusted p=0.09) |
| Presence of *BCOR* mutation  N=17 | 75% vs. 62% | 0.6  (age-adjusted p=0.95)  (sex-adjusted p=0.8) |
| Presence of *IDH1* mutation  N=10 | 100% vs. 100% | 1.0  (age-adjusted p=1.0)  (sex-adjusted p=1.0) |
| Presence of *STAG2* mutation  N=16 | 67% vs. 77% | 0.7  (age-adjusted p=0.7)  (sex-adjusted p=0.8) |
| Presence of *U2AF1* mutation  N=17 | 50% vs. 46% | 0.9  (age-adjusted p=0.95)  (sex-adjusted p=0.95) |
| Presence of *CEBPA* mutation  N=14 | 75% vs. 80% | 0.8  (age-adjusted p=0.6)  (sex-adjusted p=0.8) |
| Presence of *SF3B1* mutation  N=12 | 75% vs. 25% | 0.09  (age-adjusted p=0.08)  (sex-adjusted p=0.1) |
| Presence of *KRAS* mutation  N=15 | 50% vs. 55% | 0.9  (age-adjusted p=0.6)  (sex-adjusted p=0.9) |
| Presence of *CBL* mutation  N=9 | 33% vs. 100% | **0.03**  (age-adjusted p=0.09)  **(sex-adjusted p=0.02)** |
| Presence of *EZH2* mutation  N=4 | 0% vs. 33% | 0.4  (age-adjusted p=0.4)  (sex-adjusted p=1.0) |
| Presence of *PTPN11* mutation  N=5 | 67% vs. 0% | 0.09  **(age-adjusted p<0.01)**  (sex-adjusted p= 0.05) |
